# Supplementary material for: A Comparison of Transcriptional Patterns and Mycological Phenotypes following Infection of Fusarium graminearum by Four Mycoviruses
Source: PubMed Central journal article supplement (PMC4071046; doi:10.1371/journal.pone.0100989), 2014-06-25

Figure S1

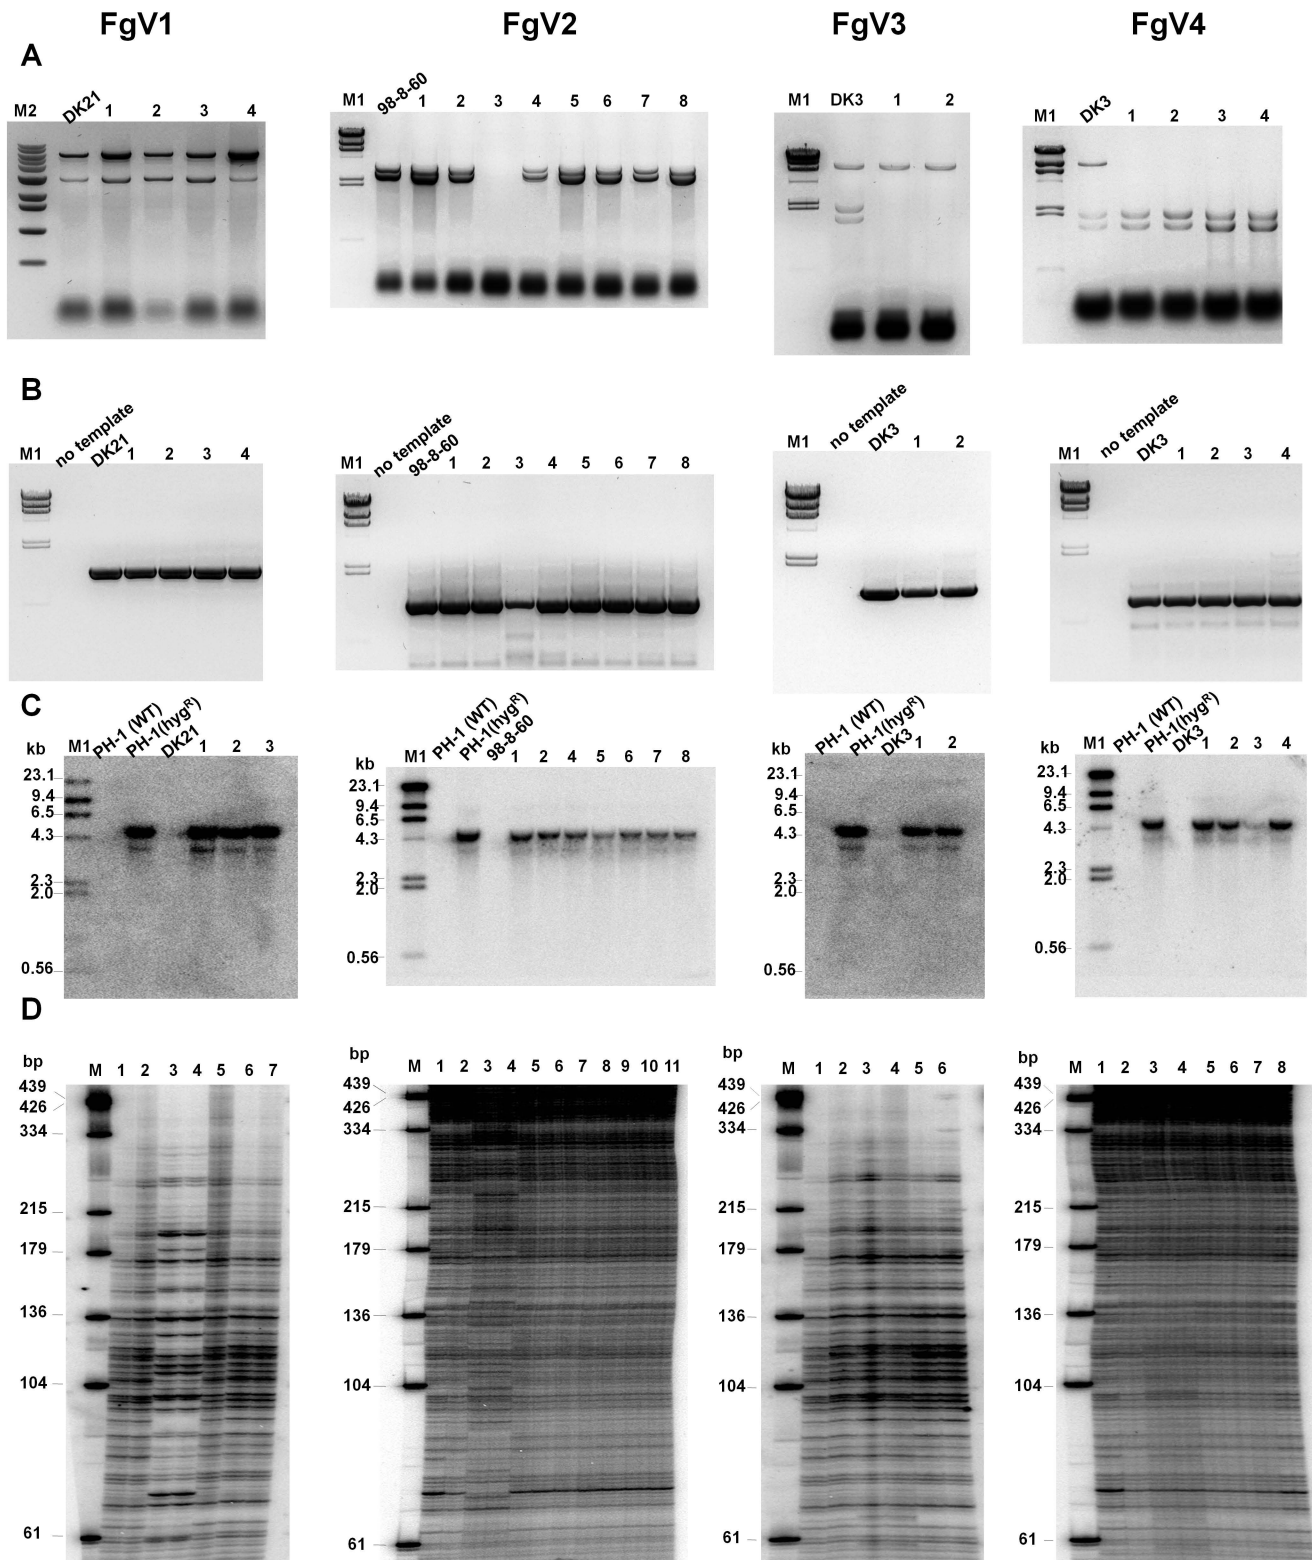

## Figure S2

Histon H3 position

*F. asiaticum*- 278 (G), *Fusarium graminearum*- 279(T)

```
                220          *           240          *           260          *           280
DK21           : GCTTCTCATCCGAAAGCTCCCCTTCCAGCGTCTCGTAAGCACCACCTGAACATCGCATCATCGCTTGACA
98-8-60        : GCTTCTCATCCGAAAGCTCCCCTTCCAGCGTCTCGTAAGCATCACCTGAACATCGCATCATCGCATGCA
DK3            : GCTTCTCATCCGAAAGCTCCCCTTCCAGCGTCTCGTAAGCATCACCCGAACATCGCATCATCGCTTGATA
NRRL_5883      : GCTTCTCATCCGAAAGCTCCCCTTCCAGCGTCTCGTAAGCATCACCCGAACATCGCATCATCGCTTGATA
NRRL_6394      : GCTTCTCATCCGAAAGCTCCCCTTCCAGCGTCTCGTAAGCATCACCCGAACATCGCATCATCGCTTGATA
NRRL_13383     : GCTTCTCATCCGAAAGCTCCCCTTCCAGCGTCTCGTAAGCATCACCCGAACATCGCATCATCGCTTGATA
NRRL_28063     : GCTTCTCATCCGAAAGCTCCCCTTCCAGCGTCTCGTAAGCATCACCCGAACATCGCATCATCGCTTGATA
NRRL_28336     : GCTTCTCATCCGAAAGCTCCCCTTCCAGCGTCTCGTAAGCATCACCCGAACATCGCATCATCGCTTGATA
NRRL_29169     : GCTTCTCATCCGAAAGCTCCCCTTCCAGCGTCTCGTAAGCATCACCCGAACATCGCATCATCGCTTGATA
NRRL_31084     : GCTTCTCATCCGAAAGCTCCCCTTCCAGCGTCTCGTAAGCATCACCCGAACATCGCATCATCGCTTGATA
PH-1 (FgV1)    : GCTTCTCATCCGAAAGCTCCCCTTCCAGCGTCTCGTAAGCATCACCCGAACATCGCATCATCGCTTGATA
PH-1 (FgV2)    : GCTTCTCATCCGAAAGCTCCCCTTCCAGCGTCTCGTAAGCATCACCCGAACATCGCATCATCGCTTGATA
PH-1 (FgV3)    : GCTTCTCATCCGAAAGCTCCCCTTCCAGCGTCTCGTAAGCATCACCCGAACATCGCATCATCGCTTGATA
PH-1 (FgV4)    : GCTTCTCATCCGAAAGCTCCCCTTCCAGCGTCTCGTAAGCATCACCCGAACATCGCATCATCGCTTGATA
                GCTTCTCATCCGAAAGCTCCCCTTCCAGCGTCTCGTAAGCATCACCCGAACATCGCATCATCGCTTGATA
```

Figure S3

PH-1 strains infected with

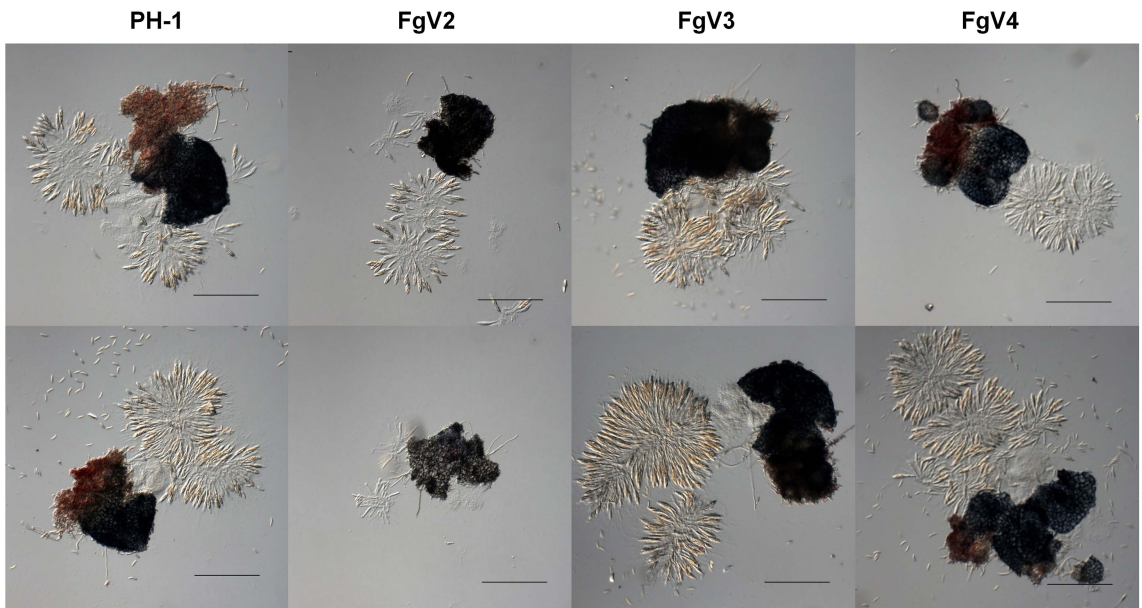

Figure S4

PH-1 strains infected with

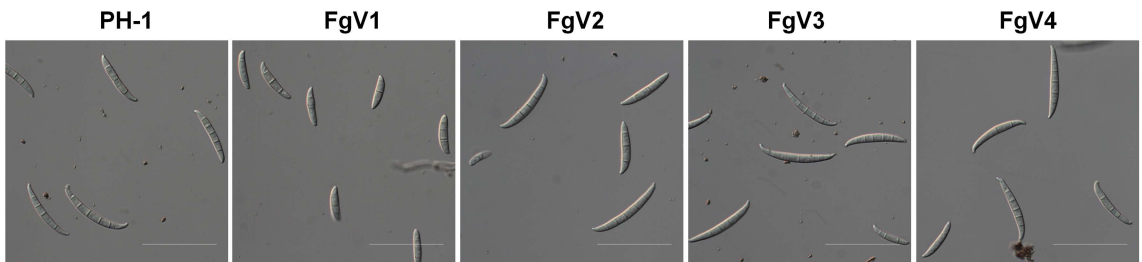

Figure S5

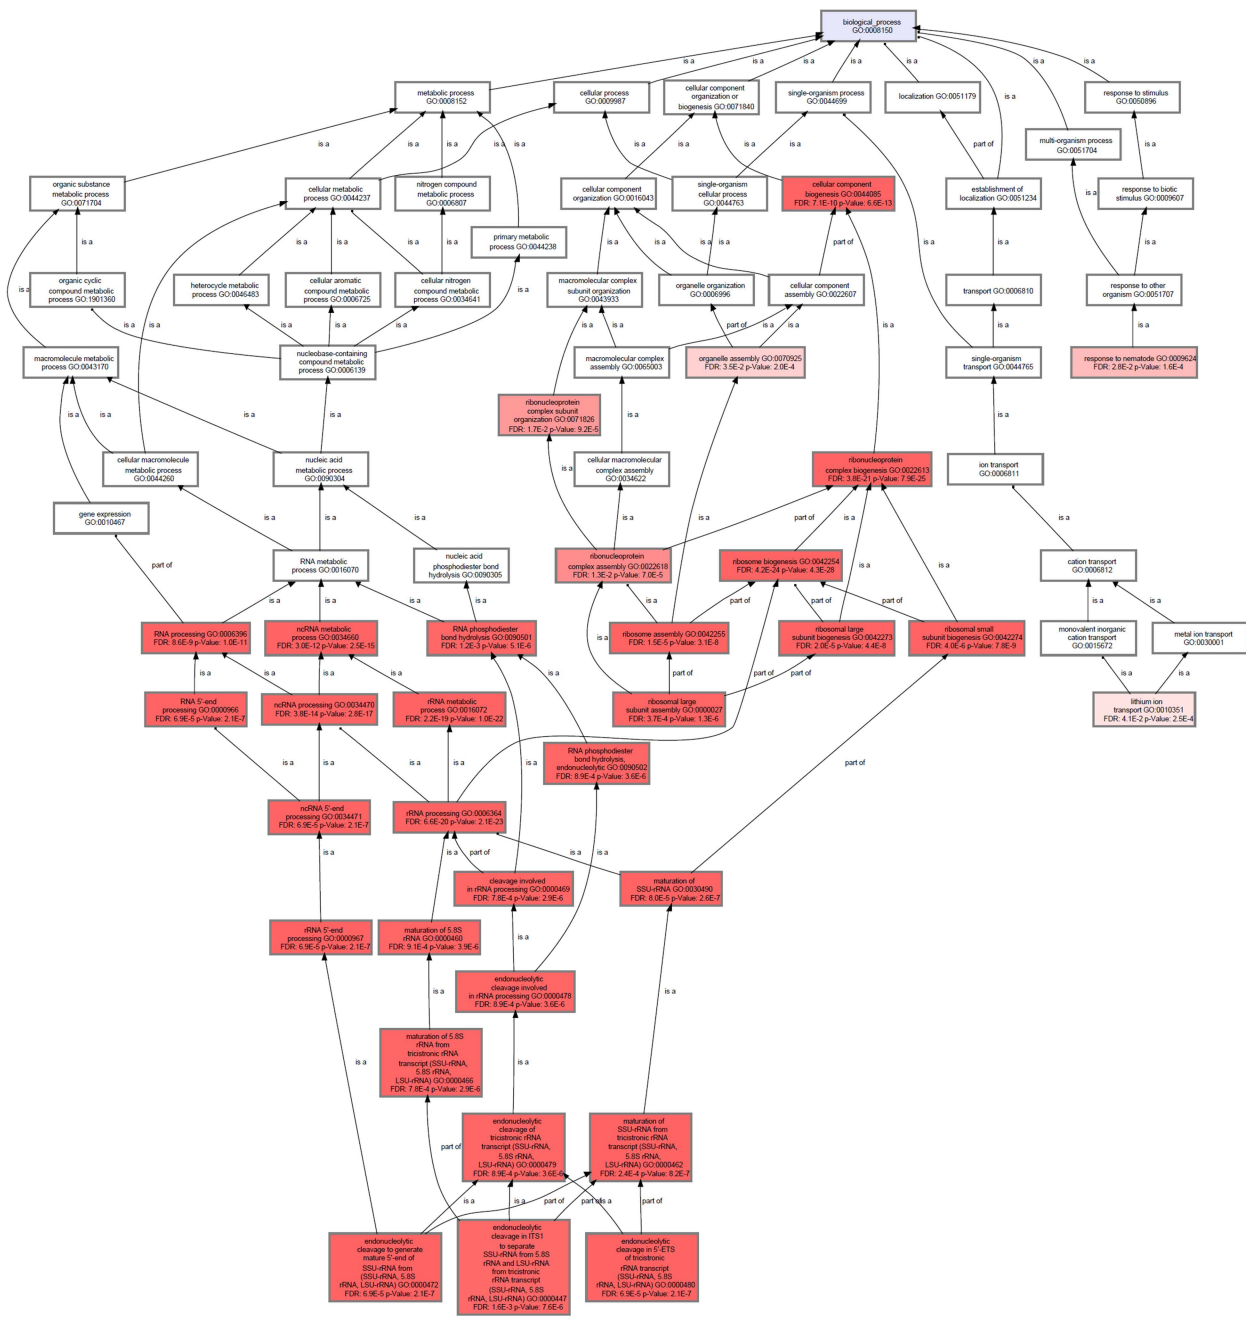

Enriched Graph

Figure S6

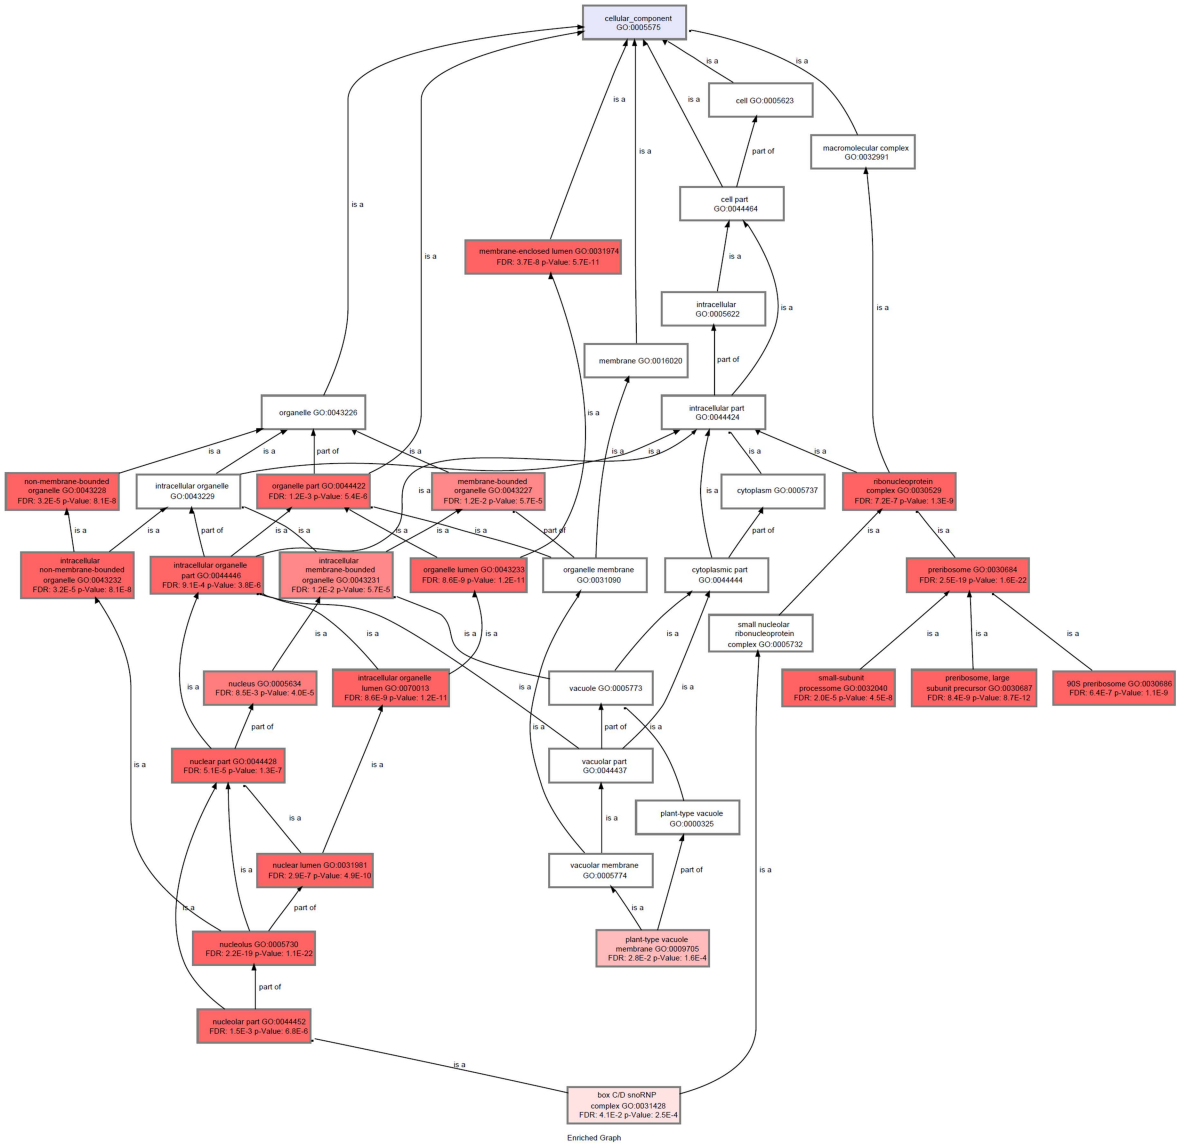

Figure S7

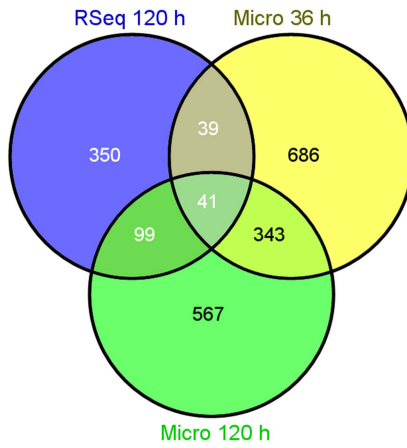

Supplement: pone.0100989.s001.pdf [file pone.0100989.s001.pdf]
